# Supplementary material
Source: Elsevier journal article supplement (https://www.sciencedirect.com/science/article/pii/S0213911119301463)
Supplement: mmc1 [file S0213911119301463:mmc1.docx]

**Apéndice. Material suplementario**

Puede consultarse material adicional a este artículo en su versión electrónica disponible en doi:10.1016….

**¿Qué se sabe sobre el tema?**

Las asfixias no intencionales han sido tradicionalmente clasificadas como «otros accidentes» en las estadísticas nacionales e internacionales. Salvo algunos estudios de casos, poco se sabe sobre este problema de salud pública en México, en particular sobre su temporalidad y el grado de exposición a factores de riesgo presentes en viviendas y guarderías.

**¿Qué añade el estudio realizado a la literatura?**

Las asfixias son la segunda causa de accidentes en México y afectan desproporcionadamente a la población infantil, que está expuesta a un importante número de riesgos que pasan desapercibidos para la población adulta. Las características de las asfixias en México, incluyendo su distribución temporal y los factores de riesgo documentados, permiten llenar brechas en el conocimiento actual, así como orientar acciones concretas de prevención.

**Editora responsable del artículo**

Laura I. González Zapata.

**Declaración de transparencia**

El autor principal (garante responsable del manuscrito) afirma que este manuscrito es un reporte honesto, preciso y transparente del estudio que se remite a Gaceta Sanitaria, que no se han omitido aspectos importantes del estudio, y que las discrepancias del estudio según lo previsto (y, si son relevantes, registradas) se han explicado.

**Contribuciones de autoría**

R. Pérez-Núñezy J.D. Vera-López concibieron el estudio y compilaron la información. R. Pérez-Núñezrealizó el análisis preliminar y redactó la primera versión del documento. Ambos autores analizaron e interpretaron los datos, revisaron críticamente las versiones previas del documento y aprobaron su versión final.

**Agradecimientos**

Agradecemos a todas las personas que recabaron información sobre la seguridad de las viviendas y las guarderías, así como a los responsables estatales de prevención de accidentes que coordinaron dichos esfuerzos locales. A las instituciones participantes, se les agradecen las facilidades brindadas para este trabajo. Agradecemos muy especialmente a las personas que de manera desinteresada permitieron verificar los riesgos en el interior de sus domicilios, sin cuyo apoyo no podríamos aprender desde la salud pública para mejorar las estrategias de prevención de lesiones no intencionales. Finalmente, agradecemos a la Mtra. Elisa Hidalgo-Solórzano su asesoría técnica, y a los revisores anónimos que proporcionaron comentarios y sugerencias útiles para enriquecer la versión final de este documento.

**Financiación**

Ninguna.

**Conflictos de intereses**

Ninguno.

**Bibliografía**

1. Celis A, Hernández P, Gómez Z, et al. Asfixia por sofocación y estrangulación en menores de 15 años. Gac Med Mex 2004;140:503-6.

2. Modelo para la prevención de asfixias en grupos vulnerables en México. México, Distrito Federal: Secretaría de Salud/STCONAPRA; 2016. 72 p.

3. Organización Panamericana de la Salud. Clasificación estadística internacional de enfermedades y problemas relacionados con la salud. Décima revisión. Washington, DC: OPS; 1995. 1177 p.

4. van Beeck EF, Branche CM, Szpilman D, Modell JH, Bierens JJ. A new definition of drowning: towards documentation and prevention of a global public health problem. Bull World Health Organ. 2005;83:853-6.

5. Lozano R, Naghavi M, Foreman K, et al. Global and regional mortality from 235 causes of death for 20 age groups in 1990 and 2010: a systematic analysis for the Global Burden of Disease Study 2010. Lancet. 2012;380:2095-128.

6. Haagsma JA, Graetz N, Bolliger I, et al. The global burden of injury: incidence mortality, disability-adjusted life years and time trends from the Global Burden of Disease study 2013. Inj Prev. 2016;22:3-18.

7. GBD 2017 Causes of Death Collaborators. Global, regional, and national age-sex-specific mortality for 282 causes of death in 195 countries and territories, 1980-2017: a systematic analysis for the Global Burden of Disease Study 2017. Lancet. 2018;392:1736-88.

8. Instituto Nacional de Estadística y Geografía. Lista mexicana para la selección de las principales causas. Ciudad de México: INEGI (México). (Consultado el 19/3/2019.) Disponible en: http://www3.inegi.org.mx/rnm/index.php/catalog/57/download/3131

9. Gjertsen F, Bruzzone S, Griffiths CE, et al. Suicide presented as a leading cause of mortality: uncover facts or misrepresent statistics? Inj Prev. 2016;22:A61.

10. Celis A, Valencia N. Traumatismos y envenenamientos en Jalisco: un estudio de la mortalidad a partir de autopsias. Salud Publica Mex. 1991;33:77-87.

11. Modelo integral para la prevención de accidentes en grupos vulnerables en méxico. Secretaría de Salud/STCONAPRA. Ciudad de México, México; 2016. 43 p.

12. Instituto Nacional de Estadística y Geografía. Estadísticas de defunciones generales en México. (Consultado el 25/3/2019.) Disponible en: https://www.inegi.org.mx/programas/mortalidad/

13. Lozano-Ascencio R. ¿Es posible seguir mejorando los registros de las defunciones en México? Gac Med Mex. 2008;144:525-33.

14. Valdespino JL, Olaiz G, López-Barajas MP, et al. Encuesta Nacional de Salud 2000. Tomo I. Vivienda, población y utilización de servicios de salud. Primera ed. Sepúlveda J, editor. Cuernavaca, Morelos, México: Instituto Nacional de Salud Pública; 2003. 291 p.

15. Olaiz-Fernández G, Rivera-Dommarco J, Shamah-Levy T, et al. Encuesta Nacional de Salud y Nutrición 2006. Cuernavaca, Morelos, México: Instituto Nacional de Salud Pública; 2006. 131 p.

16. Romero-Martínez M, Shamah-Levy T, Franco A, et al. Encuesta Nacional de Salud y Nutrición 2012: diseño y cobertura. Salud Publica Mex. 2013;55:S332-40.

17. Implementación del Modelo integral para la prevención de accidentes en grupos vulnerables en México: informe de actividades 2016. Ciudad de México, México: Secretaría de Salud/STCONAPRA; 2017. 349 p.

18. Implementación del Modelo integral para la prevención de accidentes en grupos vulnerables en México: informe de actividades 2017. Ciudad de México, México: Secretaría de Salud/STCONAPRA; 2018. 484 p.

19. Vera-López JD, Martínez-Delgadillo AL, Zapata-Díaz E, et al. Identification of risk factors of unintentional injuries in daycare centers in Mexico. Inj Prev. 2018;24:A142.

20. Proyecciones de la Población de México y de las Entidades Federativas, 2016-2050. Consejo Nacional de Población. (Consultado el 25/3/2019.) Disponible en: https://datos.gob.mx/busca/dataset/proyecciones-de-la-poblacion-de-mexico-y-de-las-entidades-federativas-2016-2050

21. Prioritizing Public Health Problems. Atlanta (GA): Centers for Disease Control and Prevention. (Consultado el 25/3/2019.) Disponible en: https://www.cdc.gov/globalhealth/healthprotection/fetp/training_modules/4/prioritize-problems_fg_final_09262013.pdf

22. United Nations General Assembly, 2015. Resolution adopted by the general assembly: 70/1. Transforming our world: the 2030 agenda for sustainable development. United Nations, New York, USA; 2015.

23. Hyder AA, Sugerman DE, Puvanachandra P, et al. Global childhood unintentional injury surveillance in four cities in developing countries: a pilot study. Bull World Health Organ. 2009;87:345-52.

24. Sistema de Vigilancia Epidemiológica de las Adicciones. Dirección General de Epidemiología de la Secretaría de Salud. (Consultado el 25/3/2019.) Disponible en: https://www.gob.mx/salud/acciones-y-programas/informes-anuales-sistema-de-vigilancia-epidemiologica-de-las-adicciones

25. Báez-Báez GL, Orozco-Valerio M, Méndez-Magaña AC, et al. Factores de riesgo de la asfixia por inmersión en aljibe en niños de uno a cuatro años. Rev Invest Clin. 2014;66:24-30.

26. Báez-Báez GL, Orozco-Valerio MJ, Dávalos-Guzmán JC, et al. Tendencia de la mortalidad de la asfixia por inmersión en niños menores de cinco años en México de 1979 a 2008. Rev Invest Clin. 2012;64:529-34.

27. Glasgow JF, Thompson AJ, Ingram PJ. Sudden unexpected death in infancy: place and time of death. Ulster Med J. 2006;75:65-71.

28. World Health Organization, UNICEF. World report on child injury prevention. Geneva, Switerland: WHO; 2008. 211 p.

29. McKenna JJ, Mosko SS, Richard CA. Bed sharing promotes breastfeeding. Pediatrics. 1997;100:214-9.

30. A review of best practices: preventing suffocation and choking injuries in Manitoba. Manitoba, Canada: Manitoba Health/Injury Prevention Centre of Children’s Hospital; 2005. 34 p.

31. Pérez-Núñez R, Mojarro-Íñiguez MG, Mendoza-García ME, et al. Análisis subnacional de la subestimación de la mortalidad asociada a lesiones causadas por el tránsito en México. Salud Pública Mex. 2016;58:412-20.

32. Naghavi M, Makela S, Foreman K, et al. Algorithms for enhancing public health utility of national causes-of-death data. Popul Health Metr. 2010;8:1-14.

33. Loredo-Avdalá A, Trejo-Hernández J, Castilla-Serna L. Children injured: abuse or accident? Diagnosis through indicators. Bol Med Hosp Infant Mex. 2003;60:368-79.

34. Mock C, Acheampong F, Adjei S, et al. The effect of recall on estimation of incidence rates for injury in Ghana. Int J Epidemiol. 1999;28:750-5.

35. Canadian Paediatric Society, Injury Prevention Committee. Preventing choking and suffocation in children: position statement. Paediatr Child Health. 2012;17:91-2.

­­­­­­­
